# Supplementary material
Source: PubMed Central journal article supplement (PMC7301160)
Supplement: DB170100SupplementaryData.pdf [file DB170100SupplementaryData.pdf]

SUPPLEMENTARY DATA

Supplementary Figure 1. Study design.

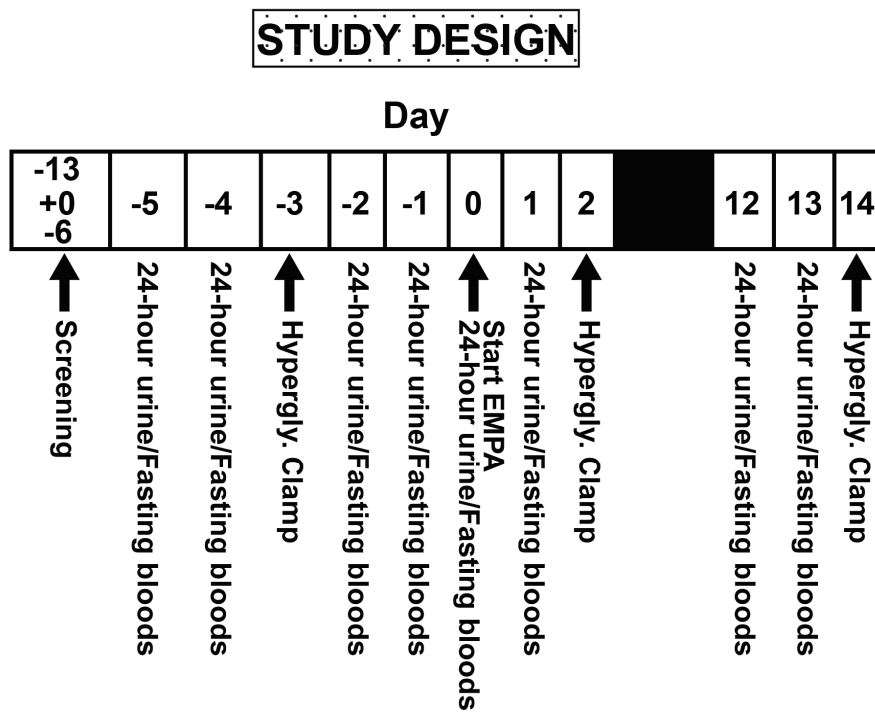

SUPPLEMENTARY DATA

**Supplementary Figure 2.** Plasma glucose concentration during the stepped hyperglycemic clamp at baseline in type 2 diabetic and nondiabetic subjects. The plasma glucose concentrations during the stepped hyperglycemic clamps performed 48 hours and 14 days after the start of empagliflozin were superimposable to those during the baseline hyperglycemic clamp. \* $p < 0.05$  versus baseline (mean of days -5,-4,-2,-1).

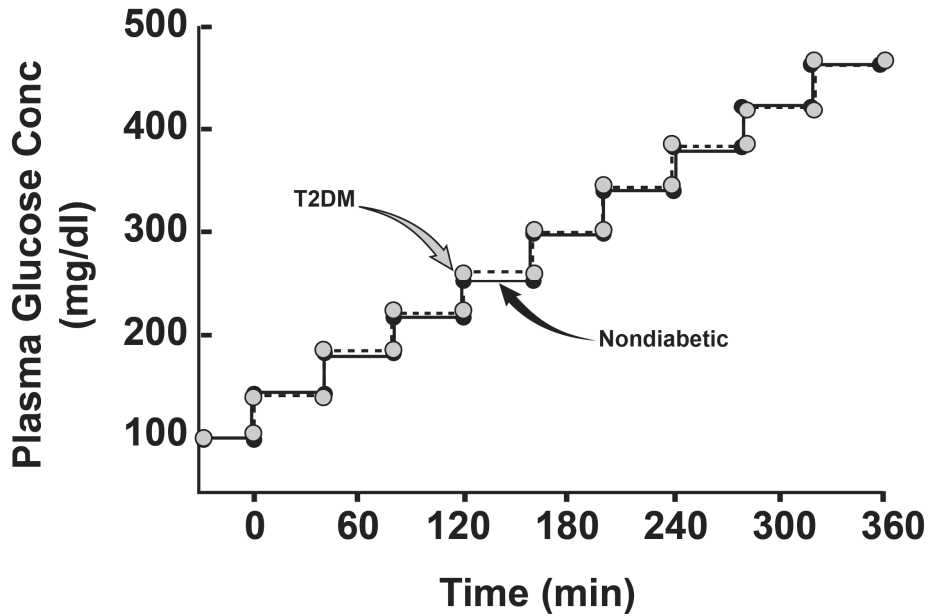

SUPPLEMENTARY DATA

**Supplementary Table 1.** Clinical, laboratory and anthropometric characteristics at baseline. \*mean of 4 values on days -5, -4, -2, and -1

|                                | <u>Nondiabetic</u> | <u>Diabetic</u> |
|--------------------------------|--------------------|-----------------|
| Number                         | 15                 | 15              |
| Age (years)                    | 57±2               | 55±2            |
| Gender (m/f)                   | 10/5               | 12/3            |
| Weight (kg)                    | 82±3               | 93±3            |
| BMI (kg/m <sup>2</sup> )       | 28.7±0.8           | 31.3±1.1        |
| HbA1c (%)                      | 5.6±0.1            | 7.8±0.2         |
| FPG (mg/dl)                    | 103±2*             | 195±9*          |
| Diabetes Duration (years)      | N/A                | 8.2±1.6         |
| GFR (ml/min)                   | 139±7*             | 132±8*          |
| Plasma Na <sup>+</sup> (meq/L) | 143±0.5            | 139±1.0         |
| K <sup>+</sup> (meq/L)         | 3.8±0.1            | 4.2±0.1         |
| Cl <sup>-</sup> (meq/L)        | 105±0.5            | 102±0.7         |
| Medications (#)                |                    |                 |
| Metformin                      |                    | 11              |
| Sulfonylurea                   |                    | 1               |
| Met/SU                         |                    | 2               |
| None                           |                    | 1               |
